# Supplementary material for: Formation of a stannylstannylene via intramolecular carbene addition of a transient stannaacetylene (RSnCR′)
Source: Royal Society of Chemistry journal article supplement (doi:10.1039/b814801e), 2008-01-01
Supplement: b814801e.pdf [file b814801e.pdf]

## Supplementary Information

### Formation of a Stannastannylene via Intramolecular Carbene Insertion Reaction of Stannaacetylene (RSn≡CR')

Wataru Setaka,<sup>\*abc</sup> Katsuyuki Hirai,<sup>d</sup> Hideo Tomioka<sup>d</sup> Kenkichi Sakamoto<sup>\*be</sup> and Mitsuo Kira<sup>\*a</sup>

<sup>a</sup> Department of Chemistry, Graduate School of Science, Tohoku University, Aoba-ku, Sendai 980-8576, Japan. E-mail: mkira@mail.tains.tohoku.ac.jp

<sup>b</sup> Photodynamics Research Center, RIKEN, 519-1399 Aoba, Aramaki, Aoba-ku, Sendai 980-0845, Japan  
<sup>c</sup> PRESTO, JST, 4-1-8 Honcho Kawaguchi, Saitama 332-0012, Japan.

<sup>d</sup> Chemistry Department for Materials, Faculty of Engineering and Instrumental Analysis Center, Mie University, Tsu, Mie 514-8507, Japan

<sup>e</sup> Department of Chemistry, Faculty of Science, Shizuoka University, Suruga-ku, Shizuoka 422-8529, Japan.

(Total 10 pages including this cover page)

#### Table of Contents

1. An NMR Study of Photoreaction of Diazomethylstannylene (1)
2. Preliminary Theoretical Calculations of Relative Energies of Intermediates
3. Laser Flash Photolysis Experiment for Diazomethylstannylene

### 1. An NMR Study of Photoreaction of Diazomethylstannylene (1)

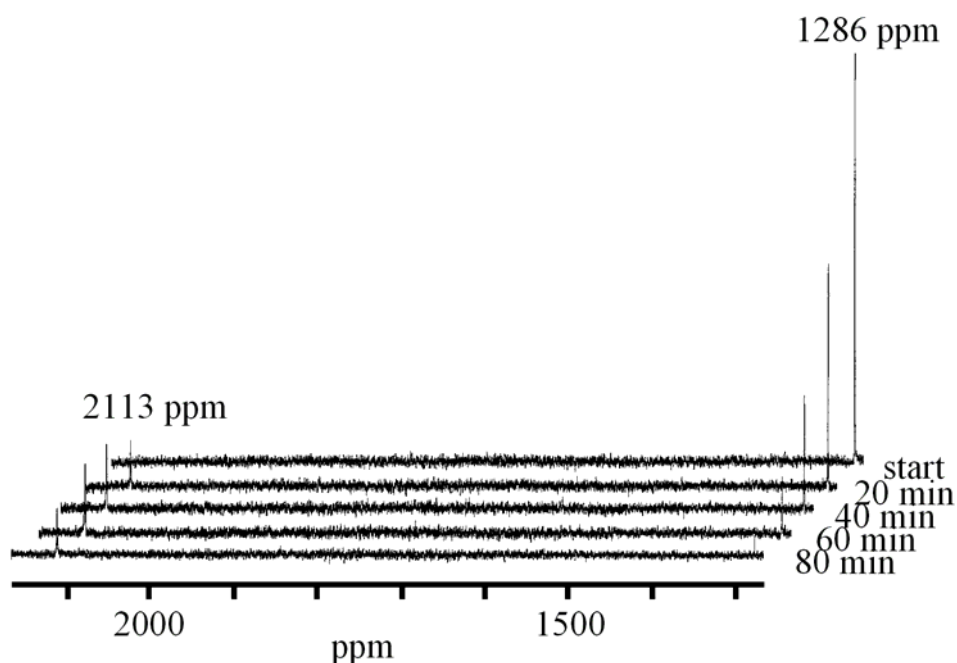

**Figure S1.** Time course of  $^{119}\text{Sn}$  NMR spectra obtained during irradiation of diazomethylstannylene **1** in benzene- $d_6$ .

## 2. Theoretical Calculations of Relative Energies of Intermediates

Relative energies of possible reaction intermediates **8-14** during the rearrangement of stannaacetylene **2** were calculated at the RHF/3-21G\* level.<sup>S1</sup> The results are shown in Figure S2. Because the theoretical level of the present preliminary calculations is low, the absolute relative energies are not reliable enough but the relative stability among the intermediates suggests an interesting feature of the rearrangement: (1) Symmetry allowed consecutive [1,5]sigmatropic rearrangements from **9** to **11** may not be feasible, because the relative energies of highly strained intermediates **13** and **14** are very high compared with those of **9**, **10**, and **11**. (2) On the other hand, a short-cut pathway from **9** to **10** that is more energetically favorable is allowed not only by photochemical [1,3]sigmatropic rearrangement but thermal suprafacial [1,3]sigmatropic rearrangement of tin. See ref. 10 in text.

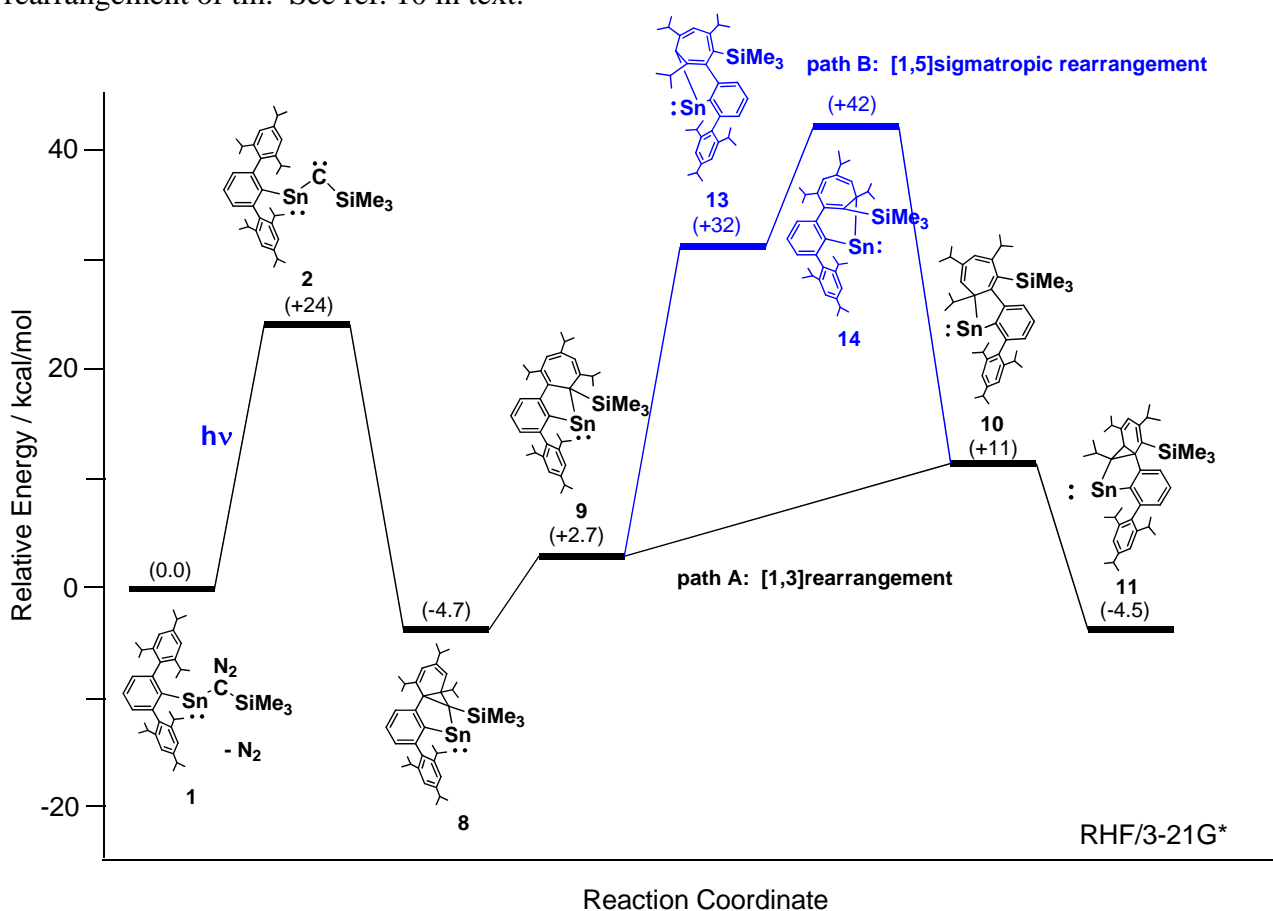

**Figure S2.** Relative energies of possible reaction intermediates in the photoreaction of **1** calculated at the RHF/3-21G\* level.

## Optimized Structures

Nitrogen HF=-108.3009536  
N,-0.4490031099,0.2635487673,0.  
N,0.4848461099,-0.2845897673,0.

### Compound 1 HF=-7932.5033449

C,3.297778704,-2.0246776275,3.5278861744  
C,2.6295470749,4.8144015807,0.1506903593  
C,0.855189769,2.1088821541,3.732792197  
C,0.5296301678,2.8803995146,2.6309678728  
C,0.7443652729,0.730398633,3.676581087  
C,3.3977768235,-2.5790179667,1.066475643  
C,2.603873986,-1.8308684257,2.1598711895  
N,3.2799296322,0.3845446153,-0.2902409905  
C,2.0564080655,3.522314275,-0.4754217043  
C,0.1230837124,2.2744240849,1.4498151218  
C,0.3411820565,0.1104885497,2.5018540868  
C,2.7762707731,3.2274169395,-1.8096421253  
C,1.1497284272,-2.2890352609,2.2531796749  
N,2.368245854,0.0201630448,-0.8205476299  
C,0.5442606731,3.6582385266,-0.6390286705  
C,0.0605580771,0.879580727,1.3672628748  
C,-0.3523248179,3.1063501965,0.2836879131  
C,0.0999148777,-1.3789376597,2.457544226  
C,-3.0606329616,4.0506260937,2.1368754419  
C,0.8680310436,-3.6442056633,2.1918021422  
C,0.0478878544,4.4000795294,-1.7036164061  
C,-1.7332968845,3.3408110261,0.1326402425  
C,-2.5644718237,-0.9566212656,4.5339555291  
C,3.3031814048,-1.3414916545,-3.5420739422  
C,-2.7452618355,2.876002688,1.1826231417  
C,1.2899124052,-0.4007702204,-1.428729134  
C,-2.5645368587,6.6900471211,-2.6008853564  
C,-1.3043249783,4.6161092012,-1.879338314  
C,-1.2079259044,-1.8616244304,2.6324913038  
C,-2.1793789953,4.0836554974,-0.9474966773  
C,-0.4198279758,-4.1318858881,2.3313156464  
C,0.745064152,-2.9845673648,-2.99521236  
C,0.017937423,-6.4012846523,3.3628297712  
C,-2.3664850943,-0.9319627248,3.000813371  
Si,1.4732884545,-1.2458288591,-3.0827492724  
Sn,-0.6602434013,-0.1081224405,-0.4865173622  
C,-1.8095602412,5.426604003,-3.0659304238  
C,-1.4398221991,-3.2286067708,2.557730635  
C,-0.7138034333,-5.6240876828,2.247864651  
C,-4.0501660515,2.3255904888,0.5701630363  
C,-0.3434609014,-6.1854520025,0.8582789821  
C,-3.688600383,-1.291136728,2.2910063434  
C,-2.7018826682,4.5651700649,-3.9852133696  
C,0.533508563,-0.2819503543,-4.405195512  
H,4.3277684209,-1.686478406,3.4785867625  
H,2.7914201842,-1.46469394,4.3035268409  
H,3.2917019091,-3.0730212849,3.8045802799  
H,3.7021955478,4.722478954,0.2872869295  
H,2.1782153043,5.0116647065,1.1147215534  
H,2.4358264324,5.6620866111,-0.4969965929  
H,1.1673921315,2.5826069523,4.6427472016  
H,0.5734772245,3.9498281035,2.6930220257  
H,0.9530777424,0.1396917012,4.5465212347  
H,4.3535947749,-2.0908869938,0.916573606  
H,3.5902769346,-3.6062430114,1.352286751  
H,2.858639216,-2.5801411266,0.1274019731  
H,2.6149336805,-0.7796356382,1.9207357559  
H,2.253524322,2.7042281438,0.1985835397  
H,3.8083720506,2.9626264739,-1.612239665  
H,2.7733004748,4.0944673441,-2.4592178272  
H,2.3022272208,2.4060618119,-2.3326784787  
H,-2.1585282974,4.4060322774,2.6188058811  
H,-3.7594046287,3.7358932352,2.9055076048  
H,-3.5022748741,4.8727178236,1.5850263476  
H,1.6715655265,-4.3335251822,2.0343747693  
H,0.7331598063,4.8222408329,-2.4104793079  
H,-1.6602846533,-0.6464999186,5.0424329496  
H,-3.3677614813,-0.2857999911,4.8217905701  
H,-2.8175317885,-1.9584352875,4.8622004134  
H,3.872310941,-1.9104133125,-2.8095635927

H,3.7514830945,-0.3525999981,-3.6151356695  
H,3.4307770361,-1.8300000834,-4.5062028031  
H,-2.2931751415,2.0889659458,1.7633784981  
H,-1.9350464881,7.3002123145,-1.9639455878  
H,-3.4547645825,6.4213614418,-2.0442116519  
H,-2.8679658778,7.2835606313,-3.4570425429  
H,-3.2290811699,4.259959968,-1.0590896556  
H,1.2622258094,-3.5917274393,-2.2555594276  
H,-0.3079454643,-2.9604535617,-2.7206510445  
H,0.8207378875,-3.4907611282,-3.9562456685  
H,1.0921642246,-6.3164531234,3.2468838298  
H,-0.2512206106,-6.0156865653,4.3390987866  
H,-0.2442896012,-7.4534163335,3.3227882722  
H,-2.0985644127,0.0724096594,2.7169438393  
H,-0.9451088197,5.744308893,-3.6388032434  
H,-2.4360063769,-3.5993265556,2.6886849852  
H,-1.7807434135,-5.7574585575,2.3903050947  
H,-4.6738474532,1.9154312552,1.3570292332  
H,-3.8438650318,1.5397559632,-0.1462589107  
H,-4.6181966968,3.104462642,0.076156001  
H,0.7220090691,-6.0950170533,0.6814003867  
H,-0.6097924791,-7.2352688455,0.7925014075  
H,-0.865433018,-5.6474652662,0.0757434676  
H,-4.4323513342,-0.5321463915,2.5079135692  
H,-4.0808031839,-2.2402505041,2.635404952  
H,-3.554866576,-1.3403490465,1.2172251782  
H,-2.1664519603,3.6863610173,-4.3246998439  
H,-3.012391888,5.1372082034,-4.853402365  
H,-3.5912154095,4.2397213359,-3.4581607588  
H,0.932637326,0.7237207162,-4.5173028086  
H,-0.5215829694,-0.1899043597,-4.1541441804  
H,0.5977175517,-0.7770715475,-5.3728062722

### Compound 2 HF=-7824.1639171

C,-0.6487831386,3.062575031,-3.5567936853  
C,1.3437425821,-3.6688675147,-3.0190001543  
C,-2.6386433262,-1.0524814863,-2.1950830039  
C,-1.8849512191,-2.0742684625,-1.6459522514  
C,-2.4583927528,0.2501993387,-1.7661806284  
C,1.61624344,2.7887928798,-2.4658403166  
C,0.1214919112,2.4216965812,-2.3800666214  
C,1.6163785971,-2.7039057179,-1.8430751218  
C,-0.9419060829,-1.7955977479,-0.6669039304  
C,-1.5090524829,0.5444924368,-0.7965040896  
C,3.1207470654,-2.375668234,-1.7574634876  
C,-0.515473533,2.8408750318,-1.05443297156  
C,1.0690417364,-3.3087564259,-0.5502236686  
C,-0.732187485,-0.4785280581,-0.2481948043  
C,-0.1614737939,-2.9061740708,-0.0200703173  
C,-1.3219807324,1.9574735049,-0.322247161  
C,-3.076519145,-4.2502036395,1.2616200972  
C,-0.3379729114,4.1324217445,-0.5900482224  
C,1.7738753221,-4.3230999662,0.0843960252  
C,-0.671639902,-3.5375000593,1.0544329638  
C,-4.3758387229,1.8517388769,1.1726377882  
C,5.0722379018,1.0342440747,-0.7341783758  
C,-2.0485749416,-3.178854596,1.6909084077  
C,2.4031896911,0.6243562527,0.7369343366  
C,1.3231853947,-7.3850343076,1.899506853  
C,1.2934355295,-4.946517483,1.2201855775  
C,-1.9494512608,2.3927132502,0.8516486345  
C,0.0676844942,-4.5437891906,1.7252490259  
C,-0.9348059575,4.5757376346,0.5795746248  
C,3.942800366,3.3786803893,0.8825646154  
C,-1.259855165,7.0324684311,0.0653015581  
C,-2.9354268661,1.4999678743,1.6101802124  
Si,4.0435432133,1.4947574579,0.7798493675  
Sn,0.6148911963,-0.1476578351,1.4797990397  
C,2.0992550456,-6.0507822037,1.8924258138  
C,-1.7364848252,3.6966398388,1.2819018269  
C,-0.7285312421,5.9992556923,1.0817113072  
C,-2.0496351492,-3.026452103,3.2267555582  
C,0.7569009559,6.2663989288,1.4047943322  
C,-2.8076249334,1.6110117424,3.144015141  
C,2.5040291432,-5.6471158826,3.3263809312

C,4.8493768588,0.8565084344,2.3673075024  
H,-0.224765358,2.7451358234,-4.5040706615  
H,-1.6929845707,2.7760685246,-3.5362725877  
H,-0.5916224615,4.1437705258,-3.5004759547  
H,1.7047580099,-3.2417537114,-3.9491577486  
H,0.2830898954,-3.8637143024,-3.1206894204  
H,1.8509114865,-4.6130610731,-2.8550450717  
H,-3.3714194913,-1.2718656793,-2.9465646845  
H,-2.0333278856,-3.0866543276,-1.9662940491  
H,-3.0536646211,1.0401044446,-2.1799928725  
H,2.0411541151,2.3854186631,-3.3792222672  
H,1.7623427537,3.8624031419,-2.4772952131  
H,2.1599946323,2.3804209285,-1.6250789667  
H,0.038924491,1.3491169529,-2.4667566959  
H,1.0862692571,-1.7823845743,-2.0319716706  
H,3.4306682475,-1.8548529268,-2.6577022475  
H,3.7197826298,-3.2748760583,-1.6753776389  
H,3.3215896361,-1.7395427515,-0.9058405613  
H,-3.1236626868,-4.3276928113,0.1824318476  
H,-4.0646356533,-3.9950709645,1.630982224  
H,-2.7989339066,-5.2185474908,1.6624101061  
H,0.2751989864,4.8077811338,-1.1514920976  
H,2.7160723393,-4.6373056845,-0.3172557551  
H,-4.4958154496,1.7170995604,0.1049252764  
H,-5.0922104319,1.2149633258,1.6819206034  
H,-4.5981274893,2.8845505682,1.4160473892  
H,4.5712650328,1.2919502159,-1.6645733808  
H,5.2830318554,-0.0310328898,-0.7553306577  
H,6.0222296008,1.566350904,-0.7193721891  
H,-2.3522330472,-2.235225388,1.263451888  
H,1.0490921067,-7.6746573774,0.8918974573  
H,0.4171864597,-7.2980600892,2.4879170179  
H,1.9321956451,-8.1723474815,2.3314880407  
H,-0.3204288172,-5.0255354857,2.599120637  
H,3.4383236755,3.8076015668,0.0207449163  
H,3.3902441064,3.6843227938,1.7681752028  
H,4.9366958833,3.8212974461,0.9392993092  
H,-0.7040569971,6.9764508235,-0.8634768323  
H,-2.3062787794,6.853477874,-0.1520935387  
H,-1.156257038,8.0375479694,0.4608685554  
H,-2.7461435313,0.4733966429,1.3345705248  
H,3.0063450573,-6.1934367724,1.315177233  
H,-2.2148264393,4.0386852336,2.1773451765  
H,-1.2964045218,6.109274595,1.9992830011  
H,-3.0225044456,-2.6762726466,3.5559609367  
H,-1.302187969,-2.3110574194,3.5466236626  
H,-1.8564029111,-3.9715806986,3.7196531529  
H,1.3635744711,6.188181836,0.5102689755  
H,0.8805738831,7.264458179,1.8123620731  
H,1.1265399184,5.5495717091,2.128169157  
H,-3.4517568178,0.8756722919,3.6143841015  
H,-3.1111848335,2.5884226439,3.4987829434  
H,-1.790169098,1.4266450941,3.4671220061  
H,3.0598227326,-4.717016619,3.3198213636  
H,3.1236582875,-6.4172052969,3.7741544234  
H,1.6263286609,-5.5145707688,3.9481908267  
H,5.0192918346,-0.2151089367,2.3194144207  
H,4.2341361263,1.0600591516,3.2407671564  
H,5.8096485585,1.3459092199,2.5233717278

Compound 8 HF=-7824.2100115

C,-1.6944904507,-3.8076553816,-3.2630085122  
C,-1.7350525976,2.1850748456,-2.8908777809  
C,1.5804708231,-0.3927343047,-4.6765529831  
C,1.5744587198,0.8168228757,-4.0101924241  
C,1.5569825276,-1.5863245194,-3.9706587098  
C,-2.1657844223,-2.641216799,-1.0596531528  
C,-1.117314424,-2.8866730581,-2.1658212044  
C,-1.0591164967,1.8495630922,-1.5472670362  
C,1.5652742941,0.8469150093,-2.6186351731  
C,1.4979858887,-1.5708896594,-2.5869452574  
C,-2.0506612112,2.041499441,-0.3812112153  
C,0.1781336152,-3.4740100726,-1.602988628  
C,0.2260189875,2.6671113018,-1.3318025605  
C,1.5024239037,-0.3509331418,-1.8992077052  
C,1.5751026822,2.1691591866,-1.8885634755  
C,1.4199547762,-2.8624777292,-1.8228264648  
C,4.771463509,3.809011229,-3.5295895812

C,0.1258372477,-4.6506916988,-0.8748570905  
C,-0.0078581369,4.1312685959,-1.4637557934  
C,2.5155981103,3.2044641219,-2.4460661189  
C,4.84877245,-3.7903747878,-2.3850200804  
C,2.9357585165,4.7430026919,0.7631001607  
C,3.8968248977,2.7148351444,-2.8906036794  
C,1.3093457051,2.1186547456,-0.3590195302  
C,0.3303747506,6.6357449217,-3.8434647064  
C,0.8451604206,4.9665030561,-2.0433806539  
C,2.5830245407,-3.4464261379,-1.3155517071  
C,2.1489830227,4.4804923815,-2.5062844599  
C,1.267625314,-5.239529361,-0.3563211394  
C,0.6236130663,3.4542957465,-2.2571894749  
C,0.6305858414,-7.6888592436,-0.4003071934  
C,3.9630950749,-2.8345131675,-1.5565490785  
Si,2.0421259817,3.1059499662,1.0547988394  
Sn,1.062948794,-0.0167085212,0.2208510338  
C,0.4671641293,6.4169888558,-2.3192491354  
C,2.4833280495,-4.6253278548,-0.5889926043  
C,1.1957964749,-6.5306019584,0.4492031954  
C,4.6516875981,2.0851221939,-1.6974048376  
C,0.3617628975,-6.3392440939,1.7339486679  
C,4.6554115582,-2.4667439073,-0.2270893706  
C,1.4611832461,7.4355930342,-1.7232662208  
C,3.2947957364,2.0072875953,1.9765437458  
H,-2.5917227937,-3.3702293454,-3.6890200201  
H,-0.9727857574,-3.952660001,-4.0581466652  
H,-1.9496691294,-4.7781844369,-2.8534164906  
H,-2.6018951189,1.5495309159,-3.0412720254  
H,-1.0481030984,2.0258457873,-3.7115712147  
H,-2.0643555077,3.2165888878,-2.9124961913  
H,1.6001795435,-0.409654028,-5.7489185604  
H,1.5820627253,1.7361682338,-4.5629600407  
H,1.5684603912,-2.5225637952,-4.4934426244  
H,-3.0472293716,-2.1689609617,-1.4813875811  
H,-2.4730115457,-3.5705128527,-0.5955616529  
H,-1.7668168332,-1.9948872904,-0.286197549  
H,-0.885592412,-1.9360829,-2.6216866468  
H,-0.7963803988,0.7999421969,-1.5876904528  
H,-2.9061710976,1.3862259612,-0.5084440866  
H,-2.4174947774,3.0599853011,-0.3403683904  
H,-1.5857513709,1.8132459384,0.5709354172  
H,4.285945673,4.2541862881,-4.3904992212  
H,5.7073151519,3.3722705989,-3.8606413961  
H,5.0018340908,4.5915037761,-2.8150350837  
H,-0.8245117681,-5.1169796453,-0.7085435052  
H,-0.968112756,4.4947468196,-1.1504197099  
H,4.3711346739,-4.0306083906,-3.3276617042  
H,5.8072276325,-3.3262336101,-2.5942010965  
H,5.0297353954,-4.714583455,-1.8487658121  
H,2.2784411737,5.4892671245,0.3381197934  
H,3.7972153298,4.6482571172,0.1114646784  
H,3.2868365985,5.1143400916,1.7257613088  
H,3.7544005822,1.9350986071,-3.625366697  
H,-0.3974256798,5.9504857708,-4.2615652998  
H,1.2795139033,6.4705145059,-4.3404860677  
H,0.0105292968,7.6513725675,-4.0529096556  
H,2.8270872907,5.2117282838,-2.8918184883  
H,-0.121795134,4.1058360382,1.8063357392  
H,0.120270041,2.5411172079,2.5688082493  
H,0.9928390425,3.946549206,3.1553477836  
H,-0.3907107993,-7.4815601699,-0.6981892484  
H,1.2241755713,-7.8326257992,-1.2954382554  
H,0.6357259998,-8.6122122443,0.1697051415  
H,3.8335893893,-1.926926526,-2.125494511  
H,-0.5026668353,6.5939827856,-1.8666507277  
H,3.3742026414,-5.0760373885,-0.1972704894  
H,2.2070850533,-6.7919818503,0.741764337  
H,5.6064436768,1.6909442349,-2.0291221204  
H,4.830991296,1.2731643908,-1.2652443162  
H,4.8352968574,2.8292860856,-0.9327202629  
H,-0.6664884723,-6.0989987109,1.4896833196  
H,0.3656291408,-7.24903865,2.3254405372  
H,0.7653972621,-5.5338111504,2.3358944332  
H,5.6129748968,-1.9944506317,-0.4206188707  
H,4.8280201089,-3.3464912131,0.3811995684  
H,4.0446444655,-1.7772983964,0.3452487232  
H,1.5291666028,7.3302030705,-0.648305932  
H,1.1310626825,8.4452538001,-1.9445649739

H,2.4521946736,7.3098296407,-2.1428468999  
H,4.0811196433,1.6384088428,1.320883403  
H,2.8357815483,1.149913558,2.4663011476  
H,3.7790723666,2.5904650644,2.7584821043

Compound 9 HF=-7824.198076

C,0.6752175306,-1.4718060672,5.8903915431  
C,-3.6899687401,4.4093093093,1.6326198932  
C,-4.8651699523,1.7765541607,0.6697345376  
C,-2.9221861594,1.8934018615,3.0424329318  
C,-1.5507661831,-1.9040905542,4.7625932982  
C,1.0884493089,6.148976909,1.0149601304  
Si,-3.283675158,2.5945959868,1.3064934543  
C,-0.1157504235,-1.3680494612,4.5675446709  
C,2.1407699713,2.181152799,3.2468128112  
C,1.2541296974,2.8706698438,2.4463315614  
C,2.2034062486,0.79730715,3.2085940106  
C,0.6299990289,-2.0986858475,3.4497754227  
C,1.0774464755,4.8532227625,0.1715728099  
C,0.6516490334,-3.4867245102,3.4462223036  
C,0.4221349647,2.1898453083,1.5519092141  
C,1.3109955377,0.0964036365,2.4168337833  
C,-1.8011280581,2.1175318467,0.214915578  
C,-0.5206004315,2.9039847952,0.6199965688  
C,-0.2877219318,4.1421342327,0.1426377249  
C,1.5134377007,5.1718356604,-1.278553922  
C,0.4029628355,0.7866924902,1.6036342357  
C,1.3131558388,-1.4073037006,2.4441932397  
C,-3.1849827852,0.1313271107,-2.3116260189  
C,2.7492250359,-6.2888502303,2.6659835237  
C,-1.8291397678,0.8462464907,-2.1269865453  
C,1.3243758034,-4.2052766805,2.4762499507  
C,-1.3112558233,4.9676480987,-0.5302614323  
C,1.3203506133,-5.7284935312,2.5018085035  
C,-1.9780716629,2.1528311431,-1.3215356888  
C,-3.2908267886,6.9628564303,-1.3957457818  
C,2.0066568953,-2.1193239421,1.4565110377  
Sn,-1.4405894762,-0.0488721567,0.8216608658  
C,-1.1468279973,1.0216210247,-3.5010994875  
C,1.9968443183,-3.5038941029,1.4895858447  
C,-2.1923369959,4.6235627635,-1.4621591167  
C,0.6511203867,-6.3042009435,1.2355176694  
C,4.3029326375,-1.7274519317,0.4717735446  
C,-3.1070190477,5.6363998854,-2.1580070153  
C,-2.2250116683,3.2655977139,-1.9990632509  
C,2.7964883434,-1.4083558056,0.3568871725  
C,-2.5621936483,5.9541584657,-3.5738343838  
C,2.2665385592,-1.7783872859,-1.0445171912  
H,0.1627768278,-0.9325168453,6.6806376675  
H,0.7736696696,-2.5087440853,6.1909861897  
H,1.6680957385,-1.0537253494,5.7782978895  
H,-4.4099393568,4.462075478,2.4489839468  
H,-4.131343151,4.8912713626,0.7687357436  
H,-2.8117935921,4.9766491521,1.9242710022  
H,-5.7039201302,2.0455456037,1.3096547452  
H,-5.1001487685,2.1082926525,-0.3389485599  
H,-4.8026350796,0.690898945,0.6560540615  
H,-3.7124195373,2.2042391989,3.7236063086  
H,-1.9828612138,2.2766008967,3.4340259671  
H,-2.8869032692,0.8043283996,3.1011483841  
H,-2.0778476412,-1.2877063767,5.4834085394  
H,-1.5447003882,-2.9206859143,5.1366483096  
H,-2.1013438579,-1.8899573938,3.8293276525  
H,0.7082279726,5.9806181723,2.0158925804  
H,2.1024124978,6.5278650182,1.0937269888  
H,0.4861167935,6.9219160097,0.5533882308  
H,-0.1837716724,-0.323669029,4.3010806653  
H,2.7800791772,2.7243776882,3.9153632273  
H,1.1947070968,3.9319016472,2.5379784976  
H,2.9081067932,0.269244649,3.8199487136  
H,1.8125061884,4.1759053109,0.5710648878  
H,0.1315776934,-4.0209468627,4.2164089713  
H,2.5192116931,5.5808311765,-1.2797866506  
H,0.8490191327,5.8925084346,-1.7375437883  
H,1.5070495547,4.2704217706,-1.879974321  
H,-3.6693944597,-0.0672926319,-1.3656338644  
H,-3.0510363054,-0.8126209599,-2.8293028512  
H,-3.8400378424,0.7621853934,-2.9009608619

H,3.2143105506,-5.8955429429,3.5622337577  
H,2.7241747811,-7.3714317092,2.7363145409  
H,3.3655818514,-6.0196921657,1.8160641929  
H,-1.1614343483,0.1847195137,-1.5736993795  
H,-1.2738733859,5.9974756988,-0.2331410598  
H,0.7367346417,-6.0412121751,3.3609758052  
H,-3.6263622657,6.7977415122,-0.3804597701  
H,-2.3645529533,7.5257887637,-1.3677527846  
H,-4.030426379,7.5713487194,-1.9048826815  
H,-0.9204334922,0.0463905307,-3.9191605045  
H,-0.2263908656,1.5831462783,-3.4043646595  
H,-1.7954949334,1.5348288258,-4.2000267511  
H,2.5286018103,-4.0449256828,0.7326062691  
H,-0.3564080427,-5.9204985428,1.1272981425  
H,0.6049968251,-7.3869335048,1.2918727398  
H,1.2150609805,-6.0353654504,0.3498053696  
H,4.677798075,-1.4463886945,1.4489567994  
H,4.4881184029,-2.7853661367,0.3266508298  
H,4.8605140234,-1.1788045368,-0.2804932327  
H,-4.0823666741,5.1701538218,-2.2632725725  
H,-2.3852930462,3.2017016332,-3.0581981333  
H,2.6724030294,-0.3448569357,0.4868857764  
H,-1.5859125789,6.417564851,-3.4896474321  
H,-3.2278261887,6.6398060732,-4.087700669  
H,-2.4654402644,5.0639346828,-4.1820670428  
H,2.3835799389,-2.8374801435,-1.2410191282  
H,1.2139332429,-1.5331088998,-1.1313201845  
H,2.8090646357,-1.2296820232,-1.8073905025

Compound 10 HF=-7824.185363

C,1.1342391106,-2.3849206765,3.9477259564  
C,-1.3963614535,2.203439726,2.8087249289  
C,2.224066239,4.4926947153,3.0481578258  
C,-3.3347836787,2.4702508497,1.2169826917  
C,-1.8091834328,2.6198119524,1.3808346979  
C,2.0433801194,-2.6640122872,2.7321710534  
C,3.210112119,1.803107012,2.2938258124  
C,3.3272709364,-3.401582471,3.1703358821  
C,0.8234883292,-4.723567977,1.9584038238  
Sn,-1.3101196981,-0.401222441,0.7798756786  
C,-1.8829094701,-6.9646133156,1.259825372  
Si,2.6303861812,3.4283770701,1.5157981993  
C,1.3016815763,-3.455934857,1.6552704877  
C,-0.2812157726,6.6186760424,1.2020549413  
C,-0.3470966667,-6.8857172186,1.392496368  
C,-1.0349013376,1.7863683303,0.3167322792  
C,0.1658938375,-5.4995657195,1.0232818617  
C,1.0350681843,3.2749178388,0.4634252565  
C,4.0996981248,4.2068165316,0.6129526029  
C,0.3312772043,-7.9783710072,0.5389119289  
C,0.8120568305,5.8716645168,0.4076685309  
C,0.4756703839,2.0331682545,0.2951347081  
C,0.3285717577,4.4704876382,-0.018514078  
C,0.8188882294,-0.4467546622,0.3002118809  
C,1.1067897354,-2.947835584,0.3685793175  
C,-1.4015879524,2.1146126631,-1.1159723132  
C,1.3064092768,0.8329086251,-0.0089166248  
C,1.6016443386,-1.5708989814,0.0237570836  
C,-0.0093510286,-4.9834329711,-0.2502908295  
C,-0.6293167399,4.4494012023,-0.9739496171  
C,-1.2489478596,3.3319910269,-1.650480341  
C,0.4472581708,-3.7225520288,-0.5958818758  
C,1.2900432465,6.7289002972,-0.7855611648  
C,-2.9449811748,4.5784735499,-3.0779511451  
C,2.8372536449,-1.4176023961,-0.5893371631  
C,2.5090162766,0.9597066977,-0.7002317098  
C,-1.7573859088,3.5911896939,-3.0729499803  
C,3.2719570854,-0.1590611396,-0.9727850983  
C,0.24433491,-3.2230098736,-2.0274928424  
C,-1.234063433,-3.3030487805,-2.4652975609  
C,-0.6269482993,4.0895266003,-3.9963132119  
C,1.1376766373,-4.0189778036,-3.0042242861  
H,1.6626773162,-1.7845810523,4.6810476327  
H,0.2432596864,-1.8470034605,3.6434385516  
H,0.8242937824,-3.30734848,4.4242396688  
H,-1.844210068,2.8621240237,3.5455418911  
H,-1.7409231228,1.1951384491,3.0416560075  
H,-0.3214150302,2.2413204233,2.9319426038

H,2.6913191794,4.0498964805,3.9250885711  
H,1.1555762478,4.5404934096,3.2400965558  
H,2.5911178006,5.5126956533,2.9697775185  
H,-3.8505216315,3.0914648024,1.9423910697  
H,-3.6510873242,1.4435819662,1.3746119423  
H,-3.6457109992,2.7758733169,0.2265712145  
H,-1.5736575111,3.6641817893,1.2591256576  
H,2.335482603,-1.7143528415,2.311883316  
H,3.9295420465,2.0553116235,3.0723270067  
H,2.3877011466,1.2731241515,2.7694515654  
H,3.688053899,1.1199530233,1.6058553698  
H,3.8722877323,-2.8047082177,3.894386876  
H,3.0912416681,-4.3557385636,3.6267052038  
H,3.9730780249,-3.5809899949,2.3187238911  
H,0.9698167157,-5.1158445698,2.9457308755  
H,-2.359633689,-6.2054987802,1.8676671617  
H,-2.2398447993,-7.9384712884,1.5779535193  
H,-2.1851776622,-6.8143137742,0.2290653404  
H,-0.5993691772,6.1935942495,2.0604052581  
H,0.0937603223,7.5744585911,1.5543365059  
H,-1.1468346865,6.8011366561,0.5762871307  
H,-0.0911189845,-7.0647736113,2.4312358796  
H,4.9268332451,4.3505460051,1.3071170832  
H,3.8606369388,5.1756491325,0.1825423592  
H,4.4585145923,3.5696656315,-0.1920401589  
H,-0.0039574613,-8.9623752849,0.8500722633  
H,1.4088871723,-7.9320841181,0.6431475504  
H,0.0844015793,-7.8533026025,-0.5090217816  
H,1.6578697912,5.7607456001,1.0603652123  
H,-1.8058542577,1.3384106606,-1.746609181  
H,-0.5112621927,-5.5749682398,-0.9892685743  
H,-0.9295166386,5.4059836898,-1.3554782712  
H,1.7353324255,7.6496672384,-0.4219047362  
H,0.4682775891,6.9945847158,-1.4384607859  
H,2.0298881358,6.1948355867,-1.3699143955  
H,-3.7417436473,4.2197595615,-2.4367470242  
H,-2.641096113,5.559011461,-2.7309417423  
H,-3.3359628479,4.6882861259,-4.0843273616  
H,3.4369128414,-2.2816352699,-0.7983658721  
H,2.827212317,1.9235925748,-1.0401560065  
H,-2.1173194732,2.6461664601,-3.4649619258  
H,4.2006615932,-0.0548595706,-1.4992535822  
H,0.548719897,-2.1879770244,-2.0699726586  
H,-1.8738948164,-2.7682377231,-1.7723291682  
H,-1.5756184121,-4.3298695174,-2.5125723915  
H,-1.3523862877,-2.8657651281,-3.4513300207  
H,0.1960148097,3.3843425986,-4.0029180922  
H,-0.2496173755,5.0476406579,-3.6597483639  
H,-0.9915140323,4.2043452664,-5.0122755031  
H,2.1809809925,-3.9330286613,-2.7249690272  
H,0.8686936234,-5.0689639359,-2.9968906987  
H,1.0207339471,-3.6425997546,-4.0153933512

Compound **11** HF=-7824.2095364

C,-0.4350894384,-1.5668779051,5.0671031054  
C,-3.7300856776,-2.1481393869,0.2973991362  
C,-5.6393256375,-1.3291517797,1.121415178  
C,-2.696161948,-2.9083243133,-1.8743327494  
C,-2.9949799824,-1.6908634546,-0.9777796597  
C,0.4599825772,-0.3550224062,4.7321674437  
C,-3.0433168891,1.1697505103,2.6203326343  
C,0.7699995207,0.4601821363,6.006454712  
C,2.6050307828,-1.6703997986,4.6887541437  
Sn,-0.1982741781,-1.9181226082,0.6864740614  
C,4.8852158347,-4.3624358967,4.0656453681  
Si,-3.8360375505,1.9225322348,1.076081617  
C,1.7540897325,-0.7845931571,4.04133595408  
C,-5.8330919937,1.5739218665,-2.6931771368  
C,4.7070640853,-3.0544098837,4.865696537  
C,-1.7039927128,-0.965231973,-0.6160113719  
C,3.7999092421,-2.0781890437,4.1274759112  
C,-2.962557702,1.367231242,-0.5302287258  
C,-3.8413974913,3.802871756,1.2968782397  
C,6.0771494278,-2.416369997,5.1794788334  
C,-4.712937193,2.4073432452,-2.0343696394  
C,-1.6917363519,0.5588658825,-0.3922695172  
C,-3.4661426308,1.5684861714,-1.7618998034  
C,0.2003610211,0.1688661442,1.2161135125

C,2.1159247946,-0.2930901053,2.7849288374  
C,-1.0635744703,-0.0207027233,-1.6644468548  
C,-0.6348644231,1.0743674532,0.5472006331  
C,1.2073734034,0.6574258931,2.0562539148  
C,4.1454251601,-1.5747935371,2.8838576808  
C,-2.8251821851,1.0191911047,-2.9690464833  
C,-1.7134898192,0.2945270929,-2.9503141528  
C,3.32680175,-0.6903102952,2.2020000638  
C,-4.369410311,3.6425379757,-2.8975989242  
C,-1.8788711249,-0.3426282967,-5.4321264405  
C,1.3738945255,2.02436166,2.219352013  
C,-0.4227699611,2.4411827653,0.6766089404  
C,-0.9719658731,-0.1602986814,-4.2010088071  
C,0.5670556796,2.9086145605,1.5208085564  
C,3.778313355,-0.1504141795,0.8441924015  
C,4.0808509227,-1.2884531473,-0.1538463124  
C,0.1544021236,0.8508402441,-4.5261671149  
C,5.0105046632,0.7653331204,1.0111164754  
H,-1.3728695955,-1.230023019,5.4963717411  
H,-0.6545017938,-2.1413619628,4.1738904704  
H,0.0459033818,-2.2257274237,5.7801080131  
H,-4.6740109214,-2.6237276113,0.050931018  
H,-3.1322312322,-2.8699847074,0.8486069061  
H,-3.9335139528,-1.3045577471,0.9426774243  
H,-6.0491083011,1.5286286302,2.111018905  
H,-5.7130579854,0.2582718619,0.9502517086  
H,-6.2849978431,1.8206314494,0.4011322499  
H,-3.6150689436,-3.420501012,-2.1418765726  
H,-2.0546346563,-3.6157757784,-1.3584178947  
H,-2.200907349,-2.6007064292,-2.7870227496  
H,-3.6506007216,-1.0256745558,-1.5221880299  
H,-0.0866762361,0.2831950077,4.0558860858  
H,-3.7431639523,1.2613697114,3.4500053653  
H,-2.8142133217,0.1149052383,2.499715081  
H,-2.1249552086,1.6731572184,2.8999549748  
H,-0.1514460141,0.7990978689,6.4688941953  
H,1.3113820421,-0.1414638305,6.7273569589  
H,1.3722707856,1.328361067,5.7656717451  
H,2.3306241798,-2.049278641,5.6537759565  
H,3.9241014851,-4.8165335635,3.8557354393  
H,5.4869531215,-5.0695607369,4.6273548292  
H,5.3832266655,-4.168652932,3.1226970907  
H,-6.0841248952,0.7175556026,-2.0785772964  
H,-6.7247492651,2.1798465089,-2.8185033792  
H,-5.5318902731,1.2158967101,-3.6701772231  
H,4.2281051883,-3.300026645,5.8074455949  
H,-4.4402863778,4.069466947,2.1669175079  
H,-4.2560889175,4.3291028924,0.4410406293  
H,-2.8371175012,4.182557823,1.4647523333  
H,6.6914532073,-3.1039618848,5.7516672192  
H,5.9531159599,-1.5053426398,5.7529777263  
H,6.6045839187,-2.173793977,4.2642055071  
H,-5.0907100023,2.778557507,-1.0964650004  
H,0.0116361138,0.0006193619,-1.7026204066  
H,5.071647327,-1.8757047612,2.436800915  
H,-3.2860494391,1.253782295,-3.9054555279  
H,-5.249578997,4.2658496906,-3.0182603354  
H,-4.0262085747,3.3541693026,-3.8833429562  
H,-3.5924086385,4.2318959547,-2.4247037572  
H,-2.7037785824,-1.0103920298,-5.2132379851  
H,-2.2803955147,0.6074720082,-5.7648113902  
H,-1.3039761267,-0.7627342363,-6.2502336088  
H,2.1386771053,2.3929862788,2.8743525595  
H,-1.0224398318,3.129470635,0.1153389704  
H,-0.5152634748,-1.1191816231,-3.9757436923  
H,0.7193183542,3.9651442688,1.6286457465  
H,2.97639464,0.4457103568,0.4361582936  
H,3.2211630614,-1.9391651051,-0.2693975091  
H,4.9160333992,-1.8924312066,0.1795289369  
H,4.3323524296,-0.8747225813,-1.1250620104  
H,0.8210215912,0.9878636432,-3.6829610638  
H,-0.2816329896,1.8112979106,-4.7742116163  
H,0.7419026719,0.5056474989,-5.3705658885  
H,4.7869888192,1.5856052405,1.6828724248  
H,5.8484114114,0.2104983675,1.4172020093  
H,5.3067115131,1.1779407535,0.0519751367

Compound **13** HF=-7824.1515041

C,1.2032121173,-3.069913486,-2.979665524  
C,-4.7498638295,2.2445992909,1.6815404173  
C,-4.5603099917,5.264038342,1.2154971331  
C,-5.3142822151,3.4058096146,-1.0958881838  
C,3.137626572,-1.8662642534,-1.8834631242  
C,-0.2076586445,5.1847960814,2.4135610282  
Si,-4.2229237052,3.5674112864,0.4449611942  
C,1.6313484301,-2.1911323847,-1.7828631475  
C,-2.5706650057,-0.601083317,-1.4760519263  
C,-2.4472318346,0.6609708739,-0.9192702839  
C,-1.7345433161,-1.6229796005,-1.0858104314  
C,1.2696172968,-2.8857879185,-0.4698202758  
C,-0.9601958946,3.8530765704,2.6013290882  
C,2.0464344664,-3.9504452643,-0.0313974603  
C,-1.4809589257,0.9373842674,0.0442744041  
C,-0.7282341429,-1.3648484545,-0.1593925771  
C,-2.3792311226,3.3316683248,0.1177604254  
C,-1.5512341356,2.2452132554,0.7747735241  
C,-0.6217580132,2.572336313,1.5989928062  
C,-0.6833841306,3.2938043797,4.0205972811  
C,-0.5781706228,-0.091677207,0.3923139593  
C,0.153451042,-2.5046588341,0.2809399222  
C,-1.3377511586,6.4918841123,-1.3883339179  
C,1.8306781344,-7.1287238109,1.6122148271  
C,-2.0836152795,5.1554061152,-1.5828291879  
C,1.7473757195,-4.665446481,1.123595452  
C,0.8156998735,2.5489171474,1.2270075675  
C,2.625658985,-5.8060696089,1.576034336  
C,-1.5486694761,4.0436969171,-0.6726345157  
C,3.3785877813,3.8359749663,0.1128081529  
C,-0.1733022852,-3.2103458527,1.4494105698  
Sn,1.1873315195,0.3694829216,1.6022908872  
C,-2.0635814291,4.7273807028,-3.0680875792  
C,0.6310704373,-4.2639850489,1.8486997933  
C,0.9178523735,3.1880715764,-0.1595493573  
C,3.2641400214,-5.5158870983,2.9511639315  
C,-2.4808857487,-3.9912102131,2.0852167555  
C,2.3126103824,3.1857442996,-0.7946813286  
C,-0.072199246,3.7806292011,-0.8594102801  
C,-1.4237728507,-2.8796779638,2.2667684612  
C,2.7424829176,1.7576973247,-1.1837589577  
C,-1.1057087114,-2.6751887067,3.7631568229  
H,1.4396644749,-2.5752064543,-3.9163882935  
H,1.7237325667,-4.0205220401,-2.9518491691  
H,0.1382924827,-3.2623771222,-2.953889893  
H,-5.8096104827,2.3355799947,1.9133666844  
H,-4.1967257037,2.3303814165,2.6138700466  
H,-4.5773094385,1.2444502043,1.2920416681  
H,-5.614723243,5.3549445834,1.4727663784  
H,-3.987402228,5.4067882301,2.1286667417  
H,-4.3158986309,6.0842540567,0.5451374814  
H,-6.3586602725,3.5442289921,-0.8189361813  
H,-5.2295713938,2.4221814042,-1.5518709193  
H,-5.0793377521,4.1440287617,-1.8581221107  
H,3.3246074595,-1.2609133127,-2.7640780114  
H,3.7300695081,-2.7686485306,-1.9716517518  
H,3.4796138097,-1.3205952975,-1.0121617313  
H,-0.376366001,5.5874588548,1.4263535672  
H,-0.5574520684,5.9051789315,3.1465388431  
H,0.8584597437,5.0583547273,2.5567134384  
H,1.0803986446,-1.2632257068,-1.8357110892  
H,-3.335521421,-0.7823663529,-2.2061762833  
H,-3.1114556423,1.4322339871,-1.2400088198  
H,-1.8511023731,-2.6098639622,-1.4872046148  
H,-2.0212056772,4.0459424952,2.5281602759  
H,2.9023014139,-4.2465540702,-0.6044081679  
H,-0.9543107602,4.0258160333,4.7744560114  
H,0.3703381453,3.0624136005,4.1429459253  
H,-1.2593883579,2.3917857089,4.1944354219  
H,-1.3908106166,6.8131703029,-0.3551201497  
H,-1.7892998164,7.2603169741,-2.0075817417  
H,-0.2947204764,6.4051864081,-1.6653959785  
H,1.3932925464,-7.3396094318,0.643457985  
H,2.4821098147,-7.9529088899,1.884004505  
H,1.0316465416,-7.0748887461,2.3424846578  
H,-3.1162521127,5.32379757,-1.3151477588  
H,1.4792218402,3.0697172081,1.9043177657  
H,3.4252651221,-5.9151851506,0.8511955489  
H,3.0688866961,4.8286246116,0.4187324733

H,3.5532683545,3.237762126,0.9991499863  
H,4.3187364812,3.9204977706,-0.4223299599  
H,-2.543004906,5.486339702,-3.6780519103  
H,-2.5937035363,3.7921294868,-3.2022949637  
H,-1.0509435824,4.6002374196,-3.4299410197  
H,0.3779617229,-4.8012640242,2.7402755385  
H,3.8321365587,-4.5936140156,2.9224314437  
H,3.930003628,-6.3239568508,3.2362243882  
H,2.5005021824,-5.4213831589,3.7144098068  
H,-2.7380967266,-4.1037763566,1.038703039  
H,-2.1044666364,-4.94042343,2.4493302315  
H,-3.3835464906,-3.746329604,2.6357894269  
H,2.2585821531,3.7673559134,-1.7070049055  
H,0.2604792665,4.199157633,-1.7906446554  
H,-1.8409165399,-1.9600001344,1.8888750487  
H,2.975779814,1.1701064,-0.3003986134  
H,3.6429248414,1.7823193224,-1.7882543735  
H,1.9613843182,1.2598324469,-1.745323381  
H,-0.7478438911,-3.5894809184,4.2210701711  
H,-0.3481579022,-1.9112543169,3.896598866  
H,-2.0015910842,-2.3655839311,4.2911573569

Compound 14 HF=-7824.1349871

C,-1.5811873297,-4.6028007868,1.7987246794  
C,3.4044283182,2.9162565367,4.9759696829  
C,0.967652297,4.7417243645,4.8400755553  
C,0.9186606301,2.0841831381,6.3911097529  
C,-3.1394531814,-2.6945293021,2.3874515153  
C,5.1954457374,3.1242414357,1.6968454943  
Si,1.5236687885,2.9347425129,4.8045301658  
C,-1.8314967132,-3.0842840114,1.6657382123  
C,2.5583067008,-2.1811624983,1.3781309422  
C,2.6264891124,-0.9428814109,1.9771799499  
C,1.4654944944,-2.5199690425,0.5944433392  
C,-1.8396606207,-2.6830804366,0.1897713971  
C,4.2437698241,1.910846131,1.5964269037  
C,-2.9267595542,-3.0299016921,-0.6019218157  
C,1.603047302,-0.0069609188,1.8003853952  
C,0.4288697783,-1.6195603093,0.4363624867  
C,0.8822909668,1.9032621406,3.3315160415  
C,1.7763373735,1.3065574456,2.5000361062  
C,2.7839262471,2.2389389311,1.9253029992  
C,4.3510931899,1.3297348205,0.1629930508  
C,0.4860917864,-0.3525227446,1.0427690157  
C,-0.7638893198,-2.0077891032,-2.06228597  
C,-2.9256464243,2.9502379529,3.5056226536  
C,-3.7942364144,-4.0924158595,-3.9162381663  
C,-1.6278013973,2.2567553461,3.9694378056  
C,-2.975409651,-2.7262500656,-1.9487627077  
C,2.2083953228,3.3695767258,1.4759530138  
C,-4.1867861892,-3.1180488976,-2.7852622223  
C,-0.5483907651,2.0880562811,2.8738967854  
C,1.2234742247,6.2293823793,0.8528862456  
C,-0.794042715,-1.6952860507,-1.7605918398  
Sn,-1.2572162915,0.9594702966,1.0050324494  
C,-1.9696315665,0.8743937376,4.5601507035  
C,-1.8983636334,-2.0602964478,-2.511057248  
C,0.7684764854,3.7590075447,1.344191436  
C,-4.8915784692,-1.8707101516,-3.3599933229  
C,1.1074371611,-1.968567869,-3.3927186502  
C,0.5632861633,4.9238153891,0.3552794453  
C,-0.3523796198,3.2740789038,1.931745819  
C,0.376873257,-0.9905398,-2.4467331012  
C,1.0505977118,4.5691275842,-1.0668737243  
C,-0.0770541449,0.269582544,-3.2136736339  
H,-1.549328094,-4.8908209707,2.8446230952  
H,-2.3736917355,-5.1605148373,1.3127523421  
H,-0.6392724903,-4.8762024304,1.3392206927  
H,3.6602225229,3.161385549,6.005810981  
H,3.8811979323,3.6487772983,4.3373321989  
H,3.8312002283,1.9417139735,4.7564088468  
H,-0.1023227459,4.8666059159,4.7043225329  
H,1.2340905488,5.1876847107,5.7977031103  
H,1.4655122868,5.3099830112,4.0594010653  
H,1.3811460967,2.5675283936,7.2510083674  
H,1.2217469227,1.0388286969,6.4041930999  
H,-0.1553806238,2.1186306687,6.5370365394  
H,-3.0481293578,-2.8966439202,3.4493702372



# Supplementary Material (ESI) for Chemical Communications  
# This journal is © The Royal Society of Chemistry 2008

H,-3.982667884,-3.2612378363,2.0120485382  
H,-3.3579695635,-1.6405289634,2.257347822  
H,5.1358881454,3.6029119215,2.6631046195  
H,6.216047815,2.7892009574,1.5451119169  
H,4.9769975751,3.8584621692,0.9307122661  
H,-1.0157139969,-2.5694811916,2.1514500785  
H,3.3502673902,-2.8892820009,1.5259839555  
H,3.4640563601,-0.7023872308,2.599725012  
H,1.415615919,-3.4806318893,0.1209225399  
H,4.5872723925,1.1657038794,2.3009095319  
H,-3.7528180585,-3.5508338044,-0.1599628556  
H,5.3786317782,1.0530553709,-0.0518040298  
H,4.0405787404,2.0814685822,-0.5538020699  
H,3.7269945445,0.4574849403,0.0414373904  
H,-2.7542834308,3.9833294315,3.2284389604  
H,-3.6480054466,2.9437743585,4.3150660606  
H,-3.3690454506,2.4346193276,2.6609172173  
H,-3.3113366562,-4.9742973636,-3.5120315817  
H,-4.6749989352,-4.403369831,-4.4685611719  
H,-3.1107049015,-3.6173980426,-4.6103675423  
H,-1.2203992305,2.8661078998,4.7660441861  
H,2.8535748189,4.0768899094,0.9941449891  
H,-4.8866994149,-3.6275056017,-2.1316681099  
H,0.8635121931,6.4846737636,1.8420674574  
H,2.3025018623,6.1433125705,0.8918154221  
H,0.9798456843,7.0438865126,0.1785270564  
H,-2.6014164582,0.9719149535,5.4369357182  
H,-1.0708461191,0.3388756352,4.840268416  
H,-2.5049356712,0.2783137076,3.826555509  
H,-1.9184353343,-1.8222114553,-3.5554580612  
H,-5.1769549123,-1.1921573127,-2.5649503221  
H,-5.7837983257,-2.1594223736,-3.9060754663  
H,-4.235102301,-1.3406221518,-4.040196639  
H,1.4635669451,-2.8336242019,-2.8458050308  
H,0.4421255807,-2.3106818548,-4.1772553421  
H,1.959283913,-1.4804191716,-3.8553256797  
H,-0.5019673156,5.1093390272,0.2921643641  
H,-1.2685238133,3.7567096318,1.6368718219  
H,1.0749907534,-0.6801061333,-1.6848579038  
H,2.1214966927,4.4095255236,-1.0916525679  
H,0.8154919681,5.3771840403,-1.7519395649  
H,0.5632446968,3.6678669654,-1.4207852036  
H,-0.7309551495,0.0155115951,-4.0393447699  
H,-0.6084680929,0.9478550865,-2.5562720262  
H,0.7867023306,0.7873808617,-3.6178845565

## Reference

- S1. *Gaussian 03*, revision A.11.4, Frisch, M. J.; Trucks, G. W.; Schlegel, H. B.; Scuseria, G. E.; Robb, M. A.; Cheeseman, J. R.; Zakrzewski, V. G.; Montgomery, J. A., Jr.; Stratmann, R. E.; Burant, J. C.; Dapprich, S.; Millam, J. M.; Daniels, A. D.; Kudin, K. N.; Strain, M. C.; Farkas, O.; Tomasi, J.; Barone, V.; Cossi, M.; Cammi, R.; Mennucci, B.; Pomelli, C.; Adamo, C.; Clifford, S.; Ochterski, J.; Petersson, G. A.; Ayala, P. Y.; Cui, Q.; Morokuma, K.; Salvador, P.; Dannenberg, J. J.; Malick, D. K.; Rabuck, A. D.; Raghavachari, K.; Foresman, J. B.; Cioslowski, J.; Ortiz, J. V.; Baboul, A. G.; Stefanov, B. B.; Liu, G.; Liashenko, A.; Piskorz, P.; Komaromi, I.; Gomperts, R.; Martin, R. L.; Fox, D. J.; Keith, T.; Al-Laham, M. A.; Peng, C. Y.; Nanayakkara, A.; Challacombe, M.; Gill, P. M. W.; Johnson, B.; Chen, W.; Wong, M. W.; Andres, J. L.; Gonzalez, C.; Head-Gordon, M.; Replogle, E. S.; Pople, J. A.; Gaussian, Inc.: Pittsburgh, PA, 2001.

### 3. Laser Flash Photolysis Experiment for Diazomethylstannylene

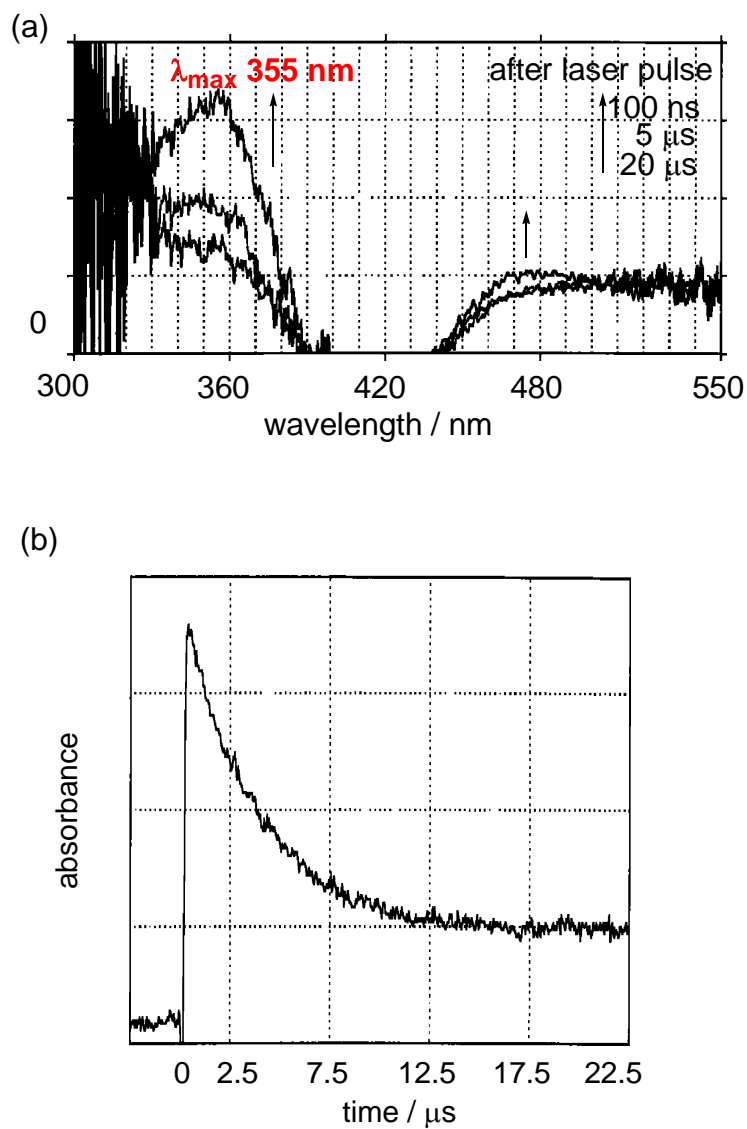

**Figure S4.** (a) Absorption spectra of the transient products formed by pulsed irradiation of diazomethylstannylene **1** in degassed benzene using a 308-nm excimer laser; (b) decay kinetics measured at 355 nm for stannaacetylene **2**.
